# Supplementary material for: The isoflavone puerarin exerts anti-tumor activity in pancreatic ductal adenocarcinoma by suppressing mTOR-mediated glucose metabolism
Source: publisher site journal article supplement (doi:10.18632/aging.203725), 2021-12-04
Supplement: Supplementary file [file aging-v13i23-203725-supplementary-material-SD1.pdf]

## SUPPLEMENTARY TABLE

Supplementary Table 1. Primary antibodies in this study.

| Reagent or Resource                   | Source      | Identifier      |
|---------------------------------------|-------------|-----------------|
| Rabbit polyclonal anti-caspase8       | Proteintech | Cat# 13423-1-AP |
| Rabbit polyclonal anti-Bcl-2          | Proteintech | Cat# 12789-1-AP |
| Rabbit polyclonal anti-Bax            | Proteintech | Cat# 50599-2-Ig |
| Rabbit monoclonal anti- $\alpha$ -SMA | ABclonal    | Cat# A17910     |
| Rabbit monoclonal anti-E-Cadherin     | Abcam       | Cat# ab231303   |
| Rabbit polyclonal anti-Vimentin       | Abcam       | Cat# ab45939    |
| Rabbit monoclonal anti-c-Myc          | Abcam       | Cat# ab32072    |
| Rabbit polyclonal anti-Snail1         | Proteintech | Cat# 13099-1-AP |
| Rabbit monoclonal anti-mTOR           | Abcam       | Cat# ab32028    |
| Rabbit polyclonal anti-p-mTOR         | Abcam       | Cat# ab131538   |
| Rabbit monoclonal anti-Ki67           | Abcam       | Cat# ab16667    |
| Rabbit polyclonal anti-GAPDH          | Proteintech | Cat# 10494-1-AP |
| Rabbit polyclonal anti-p-AKT          | Abcam       | Cat# ab38449    |
| Rabbit polyclonal anti-AKT            | Abcam       | Cat# ab8805     |
| Rabbit polyclonal anti-GLUT1          | Affinity    | Cat# AF0173     |
| Rabbit polyclonal anti-SLUG           | Abcam       | Cat# 27568      |
| Rabbit monoclonal anti-HIF1- $\alpha$ | Abcam       | Cat# ab1        |
| Rabbit polyclonal anti-Cytochrome C   | Abcam       | Cat# ab90529    |
